# Supplementary material for: Vibronic absorption, fluorescence, and phosphorescence spectra of psoralen: a quantum chemical investigation
Source: Royal Society of Chemistry journal article supplement (doi:10.1039/b518436c), 2006-01-01
Supplement: b518436c.pdf [file b518436c.pdf]

**Vibronic Absorbtion and Emission Spectra of Psoralen:  
a Quantum Chemical Investigation  
(Electronic Supplementary Information)**

Jörg Tatchen and Christel M. Marian

*Institute of Theoretical and Computational Chemistry,  
Heinrich-Heine-University, Universitätsstr. 1, D-40225 Düsseldorf,  
Germany, Tel.: +49-211-81-13209; Fax: +49-211-81-13466\**

(Dated: February 24, 2006)

---

\*Electronic address: [Christel.Marian@uni-duesseldorf.de](mailto:Christel.Marian@uni-duesseldorf.de)

# I. CARTESIAN COORDINATES FOR OPTIMIZED GEOMETRIES OF THE GROUND AND LOW-LYING EXCITED STATES

TABLE I: Electronic ground state  $S_0$  (planar, minimum according to B3LYP)

| atom | $x$ [a.u.]        | $y$ [a.u.]        | $z$ [a.u.]        |
|------|-------------------|-------------------|-------------------|
| O    | -7.64639030542405 | 1.85763697196667  | 0.000000000000000 |
| C    | -5.71367717702227 | 0.66503404197151  | 0.000000000000000 |
| O    | -3.44142493376733 | 2.00748061419886  | 0.000000000000000 |
| C    | -5.48856395405689 | -2.07707244300556 | 0.000000000000000 |
| C    | -3.21976431979261 | -3.23037572860361 | 0.000000000000000 |
| C    | -0.90706301456734 | -1.80154739354941 | 0.000000000000000 |
| C    | -1.12656844660222 | 0.86684506856927  | 0.000000000000000 |
| C    | 0.96970830335816  | 2.44604837079944  | 0.000000000000000 |
| C    | 1.48869835185168  | -2.92483296601334 | 0.000000000000000 |
| C    | 3.61888039246275  | -1.39121824776394 | 0.000000000000000 |
| C    | 3.29185235118840  | 1.25427746998339  | 0.000000000000000 |
| O    | 5.58354850572023  | 2.43019380977270  | 0.000000000000000 |
| C    | 6.31827538075786  | -1.78417275054998 | 0.000000000000000 |
| C    | 7.37225688572037  | 0.53611002000985  | 0.000000000000000 |
| H    | -7.25065719796082 | -3.10971038758187 | 0.000000000000000 |
| H    | -3.10148829943337 | -5.27704074293226 | 0.000000000000000 |
| H    | 1.64703831901247  | -4.96639159453573 | 0.000000000000000 |
| H    | 0.75950033037576  | 4.47772060255002  | 0.000000000000000 |
| H    | 7.31645150301005  | -3.55932810001923 | 0.000000000000000 |
| H    | 9.30293844213617  | 1.17708941463553  | 0.000000000000000 |

TABLE II: ( $\pi \rightarrow \pi^*$ ) excited  $S_1$  state (planar, saddle point according to TD-B3LYP)

| atom | $x$ [a.u.]        | $y$ [a.u.]        | $z$ [a.u.]       |
|------|-------------------|-------------------|------------------|
| O    | -7.66441434977344 | 1.99311998958396  | 0.00000000000000 |
| C    | -5.91044166726740 | 0.56912331505024  | 0.00000000000000 |
| O    | -3.31963770374265 | 2.05815630973501  | 0.00000000000000 |
| C    | -5.60821028894090 | -2.05567717683697 | 0.00000000000000 |
| C    | -3.27102471310462 | -3.27262709941061 | 0.00000000000000 |
| C    | -0.95842226190077 | -1.83215520224650 | 0.00000000000000 |
| C    | -1.12695855259129 | 0.88240264941041  | 0.00000000000000 |
| C    | 1.05897597446325  | 2.45122859416576  | 0.00000000000000 |
| C    | 1.42127473205986  | -2.91521566564939 | 0.00000000000000 |
| C    | 3.63640011338635  | -1.37228548549526 | 0.00000000000000 |
| C    | 3.36011829123982  | 1.25354376816689  | 0.00000000000000 |
| O    | 5.72843087079299  | 2.39325257332417  | 0.00000000000000 |
| C    | 6.26233373072756  | -1.84035226427105 | 0.00000000000000 |
| C    | 7.42040916704923  | 0.51112994116760  | 0.00000000000000 |
| H    | -7.35055698643200 | -3.12322476988720 | 0.00000000000000 |
| H    | -3.16751797924916 | -5.31139071247503 | 0.00000000000000 |
| H    | 1.60706221093191  | -4.95465025687071 | 0.00000000000000 |
| H    | 0.83625657218294  | 4.48268563400686  | 0.00000000000000 |
| H    | 7.22878515487968  | -3.63422179721025 | 0.00000000000000 |
| H    | 9.38120479600493  | 1.05930258201915  | 0.00000000000000 |

TABLE III: ( $\pi \rightarrow \pi^*$ ) excited  $S_1$  state (non-planar, minimum according to TD-B3LYP)

| atom | $x$ [a.u.]        | $y$ [a.u.]        | $z$ [a.u.]        |
|------|-------------------|-------------------|-------------------|
| O    | -7.66127954023667 | 1.99541234345628  | -0.07946812053673 |
| C    | -5.91067845448293 | 0.56879800748849  | -0.01743988096023 |
| O    | -3.31889425145244 | 2.05624837361495  | 0.11153793699293  |
| C    | -5.60779010787823 | -2.05571251833691 | -0.03067490136732 |
| C    | -3.27138677012114 | -3.27255111813919 | 0.01803326027455  |
| C    | -0.95847615102943 | -1.83236520505464 | 0.01855493904295  |
| C    | -1.12694652175309 | 0.88201028007393  | 0.04385798717204  |
| C    | 1.05793691496532  | 2.45113670762022  | -0.00220634115278 |
| C    | 1.42093276155874  | -2.91561844639579 | 0.01518639170896  |
| C    | 3.63543697755002  | -1.37233343367687 | -0.00440388733708 |
| C    | 3.35968385505675  | 1.25398609885090  | -0.00341531199690 |
| O    | 5.72796495278227  | 2.39385065238286  | -0.02150998833403 |
| C    | 6.26170793976936  | -1.84053322181714 | -0.01512885136245 |
| C    | 7.41977137539692  | 0.51112519799018  | -0.02752653239397 |
| H    | -7.34987766705837 | -3.12285284314402 | -0.07968495191998 |
| H    | -3.16753834026368 | -5.31132961635020 | 0.01429413269719  |
| H    | 1.60578433668967  | -4.95508633719314 | 0.01674572797346  |
| H    | 0.83487556259233  | 4.48172831719937  | 0.00134320694201  |
| H    | 7.22801474638555  | -3.63447489090043 | -0.01731949477475 |
| H    | 9.38060652632851  | 1.05889896328417  | -0.04146888621331 |

TABLE IV: ( $n \rightarrow \pi^*$ ) excited  $S_2$  state (planar, minimum according to TD-B3LYP)

| atom | $x$ [a.u.]        | $y$ [a.u.]        | $z$ [a.u.]       |
|------|-------------------|-------------------|------------------|
| O    | -7.59927061896794 | 2.02428100722377  | 0.00000000000000 |
| C    | -5.57678716455958 | 0.55260411831437  | 0.00000000000000 |
| O    | -3.48396056594409 | 1.96424203289848  | 0.00000000000000 |
| C    | -5.56597172914751 | -2.02456407292954 | 0.00000000000000 |
| C    | -3.20210518029374 | -3.28138114634197 | 0.00000000000000 |
| C    | -0.93481746105472 | -1.88666807455006 | 0.00000000000000 |
| C    | -1.11411007716775 | 0.80513994668505  | 0.00000000000000 |
| C    | 0.92728556417593  | 2.41712567106525  | 0.00000000000000 |
| C    | 1.51475616761931  | -2.95687108734932 | 0.00000000000000 |
| C    | 3.61980975895823  | -1.37930262756101 | 0.00000000000000 |
| C    | 3.28205640371473  | 1.25547060625977  | 0.00000000000000 |
| O    | 5.56279424491631  | 2.46234950646500  | 0.00000000000000 |
| C    | 6.32354469988418  | -1.74444741106665 | 0.00000000000000 |
| C    | 7.36283796888469  | 0.58758548367592  | 0.00000000000000 |
| H    | -7.33825420600093 | -3.03103874918508 | 0.00000000000000 |
| H    | -3.14357281515969 | -5.32299674925331 | 0.00000000000000 |
| H    | 1.71304700740241  | -4.99323464464356 | 0.00000000000000 |
| H    | 0.68602696849625  | 4.44531642352436  | 0.00000000000000 |
| H    | 7.33701144068333  | -3.51113656923826 | 0.00000000000000 |
| H    | 9.28934349977274  | 1.24110064082126  | 0.00000000000000 |

TABLE V: ( $\pi \rightarrow \pi^*$ ) excited  $S_3$  state (planar, minimum according to TD-B3LYP)

| atom | $x$ [a.u.]        | $y$ [a.u.]        | $z$ [a.u.]       |
|------|-------------------|-------------------|------------------|
| O    | -7.69119291643605 | 1.89412094953444  | 0.00000000000000 |
| C    | -5.78212472157810 | 0.61469185441705  | 0.00000000000000 |
| O    | -3.44285500088326 | 2.02121514508165  | 0.00000000000000 |
| C    | -5.52737636474048 | -2.05428628922443 | 0.00000000000000 |
| C    | -3.18012966289829 | -3.29770698874433 | 0.00000000000000 |
| C    | -0.93140242855296 | -1.84495673904479 | 0.00000000000000 |
| C    | -1.16668183910744 | 0.86521153858751  | 0.00000000000000 |
| C    | 0.94058121318728  | 2.42776522385047  | 0.00000000000000 |
| C    | 1.56783709016781  | -2.94307685476446 | 0.00000000000000 |
| C    | 3.66453547137202  | -1.39934082938818 | 0.00000000000000 |
| C    | 3.30738401124273  | 1.25223968595178  | 0.00000000000000 |
| O    | 5.55810900085979  | 2.44725716225549  | 0.00000000000000 |
| C    | 6.38299961994037  | -1.74626682655330 | 0.00000000000000 |
| C    | 7.41072614319725  | 0.58986287405316  | 0.00000000000000 |
| H    | -7.27769329178167 | -3.10871672615960 | 0.00000000000000 |
| H    | -3.08370636064155 | -5.33889461119429 | 0.00000000000000 |
| H    | 1.73567280376832  | -4.98313608205696 | 0.00000000000000 |
| H    | 0.72868477164537  | 4.45995220582728  | 0.00000000000000 |
| H    | 7.40655760972442  | -3.50701324439210 | 0.00000000000000 |
| H    | 9.32104681249948  | 1.28373575014217  | 0.00000000000000 |

TABLE VI: ( $\pi \rightarrow \pi^*$ ) excited  $T_1$  state (planar, minimum according to TD-B3LYP)

| atom | $x$ [a.u.]        | $y$ [a.u.]        | $z$ [a.u.]        |
|------|-------------------|-------------------|-------------------|
| O    | -7.67937651227137 | 1.87501765306301  | 0.000000000000000 |
| C    | -5.72026984106634 | 0.66235977205489  | 0.000000000000000 |
| O    | -3.47688511839133 | 2.02672044979784  | 0.000000000000000 |
| C    | -5.56806514111758 | -2.02118740396314 | 0.000000000000000 |
| C    | -3.10785534917419 | -3.33232720905362 | 0.000000000000000 |
| C    | -0.93073658463632 | -1.89448884500140 | 0.000000000000000 |
| C    | -1.14627162859192 | 0.85104415041634  | 0.000000000000000 |
| C    | 0.91866945316523  | 2.41412529937020  | 0.000000000000000 |
| C    | 1.57109193844281  | -2.96841512349333 | 0.000000000000000 |
| C    | 3.65749196387091  | -1.38940944857480 | 0.000000000000000 |
| C    | 3.29437505276719  | 1.24879453747881  | 0.000000000000000 |
| O    | 5.55853850239112  | 2.47106112648404  | 0.000000000000000 |
| C    | 6.36777439127174  | -1.73005315294034 | 0.000000000000000 |
| C    | 7.38329246496825  | 0.60859118905490  | 0.000000000000000 |
| H    | -7.33695224082739 | -3.03954964860884 | 0.000000000000000 |
| H    | -3.03903182129634 | -5.37307921001478 | 0.000000000000000 |
| H    | 1.76351134574632  | -5.00492510008661 | 0.000000000000000 |
| H    | 0.69452226326120  | 4.44465629830114  | 0.000000000000000 |
| H    | 7.39729498128717  | -3.48731273566288 | 0.000000000000000 |
| H    | 9.30199657448507  | 1.28410803127299  | 0.000000000000000 |

TABLE VII: ( $\pi \rightarrow \pi^*$ ) excited  $T_2$  state (planar, minimum according to TD-B3LYP)

| atom | $x$ [a.u.]        | $y$ [a.u.]        | $z$ [a.u.]        |
|------|-------------------|-------------------|-------------------|
| O    | -7.67544858213310 | 2.03273424162981  | 0.000000000000000 |
| C    | -5.96488767233300 | 0.56187853620827  | 0.000000000000000 |
| O    | -3.28809771053263 | 2.00416128327529  | 0.000000000000000 |
| C    | -5.62130222277653 | -2.04177233150726 | 0.000000000000000 |
| C    | -3.26544624444034 | -3.22138576493365 | 0.000000000000000 |
| C    | -0.95732765166087 | -1.87312678776494 | 0.000000000000000 |
| C    | -1.12393102525388 | 0.86050186125108  | 0.000000000000000 |
| C    | 1.06480306619347  | 2.45247517783294  | 0.000000000000000 |
| C    | 1.45358420066816  | -2.97586688890831 | 0.000000000000000 |
| C    | 3.65794831148283  | -1.38902349548266 | 0.000000000000000 |
| C    | 3.36138907720445  | 1.25860056265157  | 0.000000000000000 |
| O    | 5.69463637478820  | 2.42000845933844  | 0.000000000000000 |
| C    | 6.27016378282320  | -1.82224280979149 | 0.000000000000000 |
| C    | 7.42381535518970  | 0.54801371377263  | 0.000000000000000 |
| H    | -7.34098605053620 | -3.14553886437646 | 0.000000000000000 |
| H    | -3.19201268674009 | -5.26562249385481 | 0.000000000000000 |
| H    | 1.65265889843044  | -5.01065209754600 | 0.000000000000000 |
| H    | 0.83161778938821  | 4.48089455519679  | 0.000000000000000 |
| H    | 7.24816151694321  | -3.60971671355126 | 0.000000000000000 |
| H    | 9.37567476689518  | 1.12370508771048  | 0.000000000000000 |



TABLE VIII: ( $\pi \rightarrow \pi^*$ ) excited  $T_3$  state (planar, minimum according to TD-B3LYP)

| atom | $x$ [a.u.]        | $y$ [a.u.]        | $z$ [a.u.]       |
|------|-------------------|-------------------|------------------|
| O    | -7.65019281482665 | 1.90744709125749  | 0.00000000000000 |
| C    | -5.74591004222902 | 0.66185475850691  | 0.00000000000000 |
| O    | -3.43266740230905 | 2.05298267505637  | 0.00000000000000 |
| C    | -5.53931188542520 | -2.04212228569431 | 0.00000000000000 |
| C    | -3.22173883843244 | -3.28777817071764 | 0.00000000000000 |
| C    | -0.94479599171012 | -1.85372105864414 | 0.00000000000000 |
| C    | -1.14191599667716 | 0.86534218039780  | 0.00000000000000 |
| C    | 1.02774555221552  | 2.45598666158726  | 0.00000000000000 |
| C    | 1.43458220693926  | -2.94510248302264 | 0.00000000000000 |
| C    | 3.63480039517900  | -1.38947463461906 | 0.00000000000000 |
| C    | 3.32132787019428  | 1.28150111528257  | 0.00000000000000 |
| O    | 5.68154571919903  | 2.44190986397220  | 0.00000000000000 |
| C    | 6.23867538246689  | -1.84292417286702 | 0.00000000000000 |
| C    | 7.41353364643307  | 0.52762501812088  | 0.00000000000000 |
| H    | -7.31181252233909 | -3.05463265614536 | 0.00000000000000 |
| H    | -3.13037191083364 | -5.33088171915007 | 0.00000000000000 |
| H    | 1.61399803350435  | -4.98510840227824 | 0.00000000000000 |
| H    | 0.80939404616460  | 4.48791887703963  | 0.00000000000000 |
| H    | 7.20404208868671  | -3.63762419328563 | 0.00000000000000 |
| H    | 9.36824404608617  | 1.08800019217856  | 0.00000000000000 |

TABLE IX: ( $n \rightarrow \pi^*$ ) excited  $T_4$  state (planar, saddle point according to TD-B3LYP)

| atom | $x$ [a.u.]        | $y$ [a.u.]        | $z$ [a.u.]       |
|------|-------------------|-------------------|------------------|
| O    | -7.62935290616653 | 1.99378544628485  | 0.00000000000000 |
| C    | -5.56871234998162 | 0.55400915315851  | 0.00000000000000 |
| O    | -3.47590575649602 | 1.98969300334532  | 0.00000000000000 |
| C    | -5.55359076772776 | -2.02196517746352 | 0.00000000000000 |
| C    | -3.21593366250461 | -3.28339886133551 | 0.00000000000000 |
| C    | -0.93301804603114 | -1.86972675355120 | 0.00000000000000 |
| C    | -1.11232222940260 | 0.81800706743763  | 0.00000000000000 |
| C    | 0.93761868196784  | 2.42066986771771  | 0.00000000000000 |
| C    | 1.49917515533151  | -2.94459163445390 | 0.00000000000000 |
| C    | 3.62002247744879  | -1.37794298831867 | 0.00000000000000 |
| C    | 3.28993012208925  | 1.25271444928632  | 0.00000000000000 |
| O    | 5.57341150180890  | 2.45280799599174  | 0.00000000000000 |
| C    | 6.32030223867240  | -1.75539366255078 | 0.00000000000000 |
| C    | 7.36918218267630  | 0.57295610353377  | 0.00000000000000 |
| H    | -7.33029357555858 | -3.02498905954583 | 0.00000000000000 |
| H    | -3.15399646117057 | -5.32376940447171 | 0.00000000000000 |
| H    | 1.68886460427215  | -4.98221395540141 | 0.00000000000000 |
| H    | 0.70343548538217  | 4.44972458492987  | 0.00000000000000 |
| H    | 7.32679550084321  | -3.52614287211427 | 0.00000000000000 |
| H    | 9.29740546938042  | 1.22090139299277  | 0.00000000000000 |

TABLE X: Furan side dissociative excited triplet state  $T(\pi \rightarrow \sigma^*)_{fu}$  (planar, minimum according to U-B3LYP)

| atom | $x$ [a.u.]        | $y$ [a.u.]        | $z$ [a.u.]       |
|------|-------------------|-------------------|------------------|
| O    | -8.06670842383100 | 1.64529114993191  | 0.00000000000000 |
| C    | -6.07719421112000 | 0.56280007842349  | 0.00000000000000 |
| O    | -3.87162387291277 | 2.04580198050268  | 0.00000000000000 |
| C    | -5.68445651424036 | -2.16170364263799 | 0.00000000000000 |
| C    | -3.35285278202892 | -3.17801857230642 | 0.00000000000000 |
| C    | -1.13270911854421 | -1.60210960695944 | 0.00000000000000 |
| C    | -1.51718313170003 | 1.04276243409842  | 0.00000000000000 |
| C    | 0.53742987496998  | 2.72194037744970  | 0.00000000000000 |
| C    | 1.32405113294409  | -2.54760993230010 | 0.00000000000000 |
| C    | 3.45100400496322  | -0.91990070739060 | 0.00000000000000 |
| C    | 2.88231475088297  | 1.67365278621130  | 0.00000000000000 |
| O    | 8.06655766119698  | 2.06123171457540  | 0.00000000000000 |
| C    | 5.95085847073463  | -1.86609807082510 | 0.00000000000000 |
| C    | 8.14199795690860  | -0.25712396770194 | 0.00000000000000 |
| H    | -7.38279766541248 | -3.29616653877462 | 0.00000000000000 |
| H    | -3.10976848924177 | -5.21298857366825 | 0.00000000000000 |
| H    | 1.61161249205805  | -4.57787253393235 | 0.00000000000000 |
| H    | 0.20231362103188  | 4.74168382236813  | 0.00000000000000 |
| H    | 6.24875344461341  | -3.89341561673080 | 0.00000000000000 |
| H    | 9.98617452703940  | -1.23784703525034 | 0.00000000000000 |

TABLE XI: Pyrone side dissociative excited triplet state  $T(\pi \rightarrow \sigma^*)_{py}$  (planar, saddle point according to U-B3LYP)

| atom | $x$ [a.u.]        | $y$ [a.u.]        | $z$ [a.u.]       |
|------|-------------------|-------------------|------------------|
| O    | -9.29936956866615 | 0.70095281647962  | 0.00000000000000 |
| C    | -7.06905871982390 | 0.40011820493340  | 0.00000000000000 |
| O    | -2.60807872416317 | 3.02706619533443  | 0.00000000000000 |
| C    | -5.77925849692458 | -2.05122504796379 | 0.00000000000000 |
| C    | -3.28297821433441 | -2.59795678657245 | 0.00000000000000 |
| C    | -0.93004913194617 | -1.17698454968519 | 0.00000000000000 |
| C    | -0.72992148730556 | 1.63489244288611  | 0.00000000000000 |
| C    | 1.78365024148455  | 2.76866364601049  | 0.00000000000000 |
| C    | 1.26519002786075  | -2.60861577127444 | 0.00000000000000 |
| C    | 3.65737018842059  | -1.46020611666112 | 0.00000000000000 |
| C    | 3.82493292581326  | 1.21534100666064  | 0.00000000000000 |
| O    | 6.32474826871975  | 1.92806788584115  | 0.00000000000000 |
| C    | 6.19751184358060  | -2.35390161650760 | 0.00000000000000 |
| C    | 7.69119984793523  | -0.26053677228412 | 0.00000000000000 |
| H    | -7.06587585082639 | -3.66172183847200 | 0.00000000000000 |
| H    | -2.91246910403713 | -4.61975443748872 | 0.00000000000000 |
| H    | 1.13694857449863  | -4.65317592302084 | 0.00000000000000 |
| H    | 1.91008935195138  | 4.80779379850061  | 0.00000000000000 |
| H    | 6.84414356818255  | -4.28544744209095 | 0.00000000000000 |
| H    | 9.71331671974099  | -0.02525906330675 | 0.00000000000000 |

TABLE XII: Pyrone side dissociative excited triplet state  $T(\pi \rightarrow \sigma^*)_{py}$  (non-planar, minimum according to U-B3LYP)

| atom | $x$ [a.u.]        | $y$ [a.u.]        | $z$ [a.u.]        |
|------|-------------------|-------------------|-------------------|
| O    | -8.37371862062672 | 1.28547662771427  | -1.22071914040309 |
| C    | -6.40774475515927 | 0.21274753940812  | -1.17609313710622 |
| O    | -2.82882839878535 | 2.67456290118766  | 1.21628560302034  |
| C    | -5.69366843507624 | -2.08342674170445 | 0.19293626893468  |
| C    | -3.32604642534000 | -2.79174001213170 | 0.79011323637660  |
| C    | -0.97617651409481 | -1.38785762399544 | 0.51230391481333  |
| C    | -0.91051193071973 | 1.42093573584778  | 0.69909685354885  |
| C    | 1.49995661234642  | 2.69102158809824  | 0.35951417002998  |
| C    | 1.24335848679466  | -2.72040150339611 | 0.19175744203489  |
| C    | 3.55567564904200  | -1.43911196706581 | -0.09818697195669 |
| C    | 3.58912986244894  | 1.24012593931188  | -0.00363310757296 |
| O    | 6.02393538612246  | 2.08974591487909  | -0.32990127863430 |
| C    | 6.10985469473617  | -2.18917317331102 | -0.49816331713339 |
| C    | 7.48362914938150  | -0.01782517942436 | -0.62064803451239 |
| H    | -7.24742067270193 | -3.37976613148699 | 0.56577701777372  |
| H    | -3.10487050590593 | -4.67488192344729 | 1.57772392482559  |
| H    | 1.20160204667455  | -4.76742635586742 | 0.11422541546044  |
| H    | 1.54380094161800  | 4.73079054008137  | 0.46552774972431  |
| H    | 6.84364357801984  | -4.08099688072308 | -0.67705517927332 |
| H    | 9.47028459814921  | 0.32897094690181  | -0.89805233107877 |

## II. INTENSITY BORROWING OF THE RADIATIVE SPIN-FORBIDDEN $S_0 \leftarrow T_1$ TRANSITION

TABLE XIII: Significant contributions to the transition dipole moment from singlet states (top) and triplet states (bottom). All values were obtained at the  $T_1$  minimum geometry. Vertical energy differences [ $cm^{-1}$ ].  $\langle T_1 | \mathcal{H}_{SO} | ^1\Phi \rangle$  and  $\langle ^3\Phi | \mathcal{H}_{SO} | S_0 \rangle$ : spin-orbit coupling matrix elements [ $cm^{-1}$ ].  $\langle S_0 | \mu | ^1\Phi \rangle$  and  $\langle T_1 | \mu | ^3\Phi \rangle$ : electric dipole (transition) moments [ $ea_0$ ] of spin-allowed transitions. Cartesian components of the spin-orbit coupling and electric dipole operators are given in parantheses.

| singlets $ ^1\Phi\rangle^\dagger$ | @ $T_1$  | $E_{i\Phi} - E_{T_1}$ | $\langle ^1\Phi   \mathcal{H}_{SO}   T_1 \rangle$ | $\langle S_0   \mu   ^1\Phi \rangle$ |
|-----------------------------------|----------|-----------------------|---------------------------------------------------|--------------------------------------|
| $S_0$                             | $X^1A'$  | -17157.4              | $-i \cdot 3.0 \cdot 10^{-2}(z)$                   | 2.095(x)/-1.677(y)                   |
| $S_1$                             | $2^1A'$  | 9811.3                | $i \cdot 1.7 \cdot 10^{-2}(z)$                    | -1.483(x)/-0.255(y)                  |
| $S_2$                             | $1^1A''$ | 12196.7               | $i \cdot 28.585(x)/16.815(y)$                     | 0.045(z)                             |
| $S_3$                             | $3^1A'$  | 13422.1               | $i \cdot 1.8 \cdot 10^{-2}(z)$                    | -1.898(x)/ 0.279(y)                  |
|                                   | $4^1A'$  | 19551.8               | $i \cdot 2.2 \cdot 10^{-2}(z)$                    | -0.810(x)/ 0.648(y)                  |
|                                   | $5^1A'$  | 20512.8               | $i \cdot 3.9 \cdot 10^{-2}(z)$                    | 0.187(x)/ 0.036(y)                   |
| triplets $ ^3\Phi\rangle^\dagger$ | @ $T_1$  | $E_{3\Phi} - E_{S_0}$ | $\langle ^3\Phi   \mathcal{H}_{SO}   S_0 \rangle$ | $\langle ^3\Phi   \mu   T_1 \rangle$ |
| $T_1$                             | $1^3A'$  | 17157.4               | $i \cdot 3.0 \cdot 10^{-2}(z)$                    | 1.522(x)/-1.489(y)                   |
| $T_2$                             | $2^3A'$  | 24921.7               | $-i \cdot 1.5 \cdot 10^{-2}(z)$                   | 0.027(x)/-0.316(y)                   |
| $T_3$                             | $3^3A'$  | 29150.6               | $-i \cdot 3.0 \cdot 10^{-2}(z)$                   | 0.140(x)/ 0.007(y)                   |
| $T_4$                             | $1^3A''$ | 28845.6               | $-i \cdot 35.846(x)/25.846(y)$                    | -0.022(z)                            |
|                                   | $4^3A'$  | 32549.5               | $-i \cdot 2.3 \cdot 10^{-2}(z)$                   | -0.369(x)/-0.185(y)                  |
|                                   | $5^3A'$  | 34645.2               | $i \cdot 1.3 \cdot 10^{-2}(z)$                    | 0.646(x)/-0.244(y)                   |
|                                   | $6^3A'$  | 36850.0               | $i \cdot 0.7 \cdot 10^{-2}(z)$                    | -0.024(x)/-0.043(y)                  |
|                                   | $7^3A'$  | 40680.1               | $-i \cdot 7.6 \cdot 10^{-2}(z)$                   | -0.771(x)/-0.188(y)                  |

$\dagger$ : For the higher excited states it becomes exceedingly difficult to find a 1:1 correspondence between the CI root at the  $T_1$  geometry and a state at the ground state minimum.

### III. ANALYSIS OF THE VIBRONIC SPECTRA: CONTRIBUTING VIBRATIONAL NORMAL MODES OF THE $S_0$ , $S_1$ , AND $T_1$ STATE

TABLE XIV: Totally symmetric harmonic vibrational modes of the  $S_1$  state with large contributions to the vibronic structure of the absorption band. The frequencies  $\bar{\nu}$  [ $\text{cm}^{-1}$ ] have not been scaled.  $\Delta$  denotes the shift in natural (dimensionless) oscillator coordinates with respect to the  $S_0$  state. Only modes with  $\Delta > 0.6$  are listed.

| mode | $\bar{\nu}$ | type                                                                                                                                                 | $\Delta$ |
|------|-------------|------------------------------------------------------------------------------------------------------------------------------------------------------|----------|
| 4    | 192         | C <sub>7</sub> -O <sub>8</sub> str., frame def. (pyrone)                                                                                             | 0.618    |
| 7    | 320         | frame def. (coumarin), C <sub>6</sub> -C <sub>7</sub> -O <sub>8</sub> bend, C <sub>7</sub> -O <sub>8</sub> str.                                      | 0.755    |
| 9    | 382         | frame def. (coumarin), C <sub>6</sub> -C <sub>7</sub> =O <sub>10</sub> bend, O <sub>10</sub> -C <sub>7</sub> -O <sub>8</sub> bend                    | 1.349    |
| 13   | 518         | frame def. (pyrone)                                                                                                                                  | 0.844    |
| 15   | 544         | C <sub>7</sub> -O <sub>8</sub> str., frame def. (pyrone)                                                                                             | 0.773    |
| 18   | 618         | frame def. (coumarin), C <sub>6</sub> -C <sub>7</sub> -O <sub>8</sub> bend, C <sub>7</sub> -O <sub>8</sub> str., C <sub>6</sub> -C <sub>7</sub> str. | 0.608    |
| 46   | 1564        | C-C str., frame def. (psoralen), C-H bend                                                                                                            | 0.701    |
| 48   | 1863        | C <sub>7</sub> =O <sub>10</sub> str., C <sub>6</sub> -C <sub>7</sub> str.                                                                            | 0.696    |

TABLE XV: Totally symmetric harmonic vibrational modes of the  $S_0$  state with large contributions to the vibronic structure of the fluorescence emission band. The frequencies  $\bar{\nu}$  [ $\text{cm}^{-1}$ ] have not been scaled.  $\Delta$  denotes the shift in natural (dimensionless) oscillator coordinates with respect to the  $S_0$  state. Only modes with  $\Delta > 0.7$  are listed.

| mode | $\bar{\nu}$ | type                                                                                                                                    | $\Delta$ |
|------|-------------|-----------------------------------------------------------------------------------------------------------------------------------------|----------|
| 9    | 399         | frame def. (coumarin), C <sub>6</sub> -C <sub>7</sub> -O <sub>8</sub> bend                                                              | 1.429    |
| 18   | 740         | frame def. (psoralen), C <sub>7</sub> -O <sub>8</sub> str., C <sub>6</sub> -C <sub>7</sub> str.                                         | 1.330    |
| 31   | 1090        | C-H bend, C <sub>6</sub> -C <sub>7</sub> str., C <sub>7</sub> -O <sub>8</sub> str., C <sub>6</sub> -C <sub>7</sub> -O <sub>8</sub> bend | 1.311    |
| 32   | 1119        | C-H bend, O <sub>8</sub> -C <sub>8a</sub> str., frame def. (psoralen)                                                                   | 0.713    |
| 33   | 1154        | C-H bend, C <sub>2</sub> -C <sub>3</sub> str., frame def. (psoralen)                                                                    | 1.148    |
| 46   | 1658        | C <sub>5</sub> -C <sub>6</sub> str., C-C str., C-H bend, frame def. (psoralen)                                                          | 0.779    |

TABLE XVI: Totally symmetric harmonic vibrational modes of the  $S_0$  state with large contributions to the vibronic structure of the phosphorescence emission band. The frequencies  $\bar{\nu}$  [ $\text{cm}^{-1}$ ] have not been scaled.  $\Delta$  denotes the shift in natural (dimensionless) oscillator coordinates with respect to the  $T_1$  state. Only modes with  $\Delta > 0.5$  are listed.

| mode | $\bar{\nu}$ | type                                                                                | $\Delta$ |
|------|-------------|-------------------------------------------------------------------------------------|----------|
| 4    | 239         | frame def. (psoralen)                                                               | 0.579    |
| 15   | 616         | frame def. (coumarin)                                                               | 0.570    |
| 34   | 1184        | C-H bend, C <sub>5</sub> -C <sub>6</sub> str.                                       | 0.522    |
| 35   | 1196        | C-H bend, C <sub>7</sub> -O <sub>8</sub> str., O <sub>1</sub> -C <sub>9a</sub> str. | 0.501    |
| 40   | 1392        | C-C str., C-H bend, frame def. (psoralen)                                           | 0.529    |
| 45   | 1600        | C <sub>5</sub> -C <sub>6</sub> str., C-C str., C-H bend, frame def. (psoralen)      | 0.870    |
| 46   | 1658        | C <sub>5</sub> -C <sub>6</sub> str., C-C str., C-H bend, frame def. (psoralen)      | 0.964    |
| 47   | 1667        | C <sub>5</sub> -C <sub>6</sub> str., C-C str., C-H bend, frame def. (psoralen)      | 1.473    |
